# Supplementary material for: Uncovering periodic patterns of space use in animal tracking data with periodograms, including a new algorithm for the Lomb-Scargle periodogram and improved randomization tests
Source: Springer Nature journal article supplement (doi:10.1186/s40462-016-0084-7), 2016-07-02
Supplement: 40462_2016_84_MOESM1_ESM.pdf [file 40462_2016_84_MOESM1_ESM.pdf]

# Appendix to “Periodograms for movement ecologists: a non-parametric method to uncover periodic patterns of space use in animal tracking data”

Guillaume Péron<sup>1</sup>, Chris H. Fleming<sup>1,2</sup>, Rogerio C. de Paula<sup>1</sup>, and Justin M. Calabrese<sup>1,2</sup>

<sup>1</sup>Conservation Ecology Center, Smithsonian Conservation Biology Institute, National Zoological Park, 1500 Remount Rd., Front Royal, VA 22630

<sup>2</sup>Department of Biology, University of Maryland College Park, College Park, Maryland 20742

<sup>3</sup>National Research Center for Carnivore Conservation (CENAP/ICMBio), Atibaia, Sao Paulo, Brazil

April 29, 2016

## 1 **Appendix A: FFT Lomb-Scargle periodogram**

2 A periodogram estimates the spectral-density function  $\tilde{\sigma}(f)$  at frequency  $f$ , which is itself the  
3 Fourier transform of the stationary (or time-averaged) autocorrelation function  $\sigma(\tau)$ .

$$4 \quad \tilde{\sigma}(f) \equiv \int_{-\infty}^{+\infty} dt e^{-2\pi i f \tau} \sigma(\tau) \propto \text{VAR} \left[ \int_{-\infty}^{+\infty} dt e^{-2\pi i f t} x(t) \right] = \text{VAR}[\tilde{x}(f)] , \quad (\text{A.1})$$

$$5 \quad \sigma(\tau) = \underbrace{\lim_{T \rightarrow \infty} \frac{1}{2T} \int_{-T}^{+T} dt \text{COV}[x(t+\tau), x(t)]}_{\text{time average}} , \quad (\text{A.2})$$

6

7 where the noted time average is unnecessary for process with stationary autocorrelation func-  
8 tions that have no dependence upon absolute time  $t$ , and where we define the variance of any  
9 complex-valued process  $\text{VAR}[z] \equiv \langle z z^* \rangle$ , where  $z^*$  denotes the complex conjugate of  $z$ . The DFT

10 periodogram is a straightforward approximation to the variance of the (continuous) Fourier trans-  
 11 form of  $x(t)$  via the discrete Fourier transform (DFT). Another way of motivating the periodogram,  
 12 which more readily generalizes in the case of missing data, is that the periodogram at frequency  $f$   
 13 is equivalent to the the ‘power’ derived from a least-squares fit of all  $n$  data points to a sinusoid  
 14 of frequency  $f$ . “Power” in this context is bit of a mathematical abstraction that we will later  
 15 define, but note that if the signal  $x(t)$  represents oscillator position, velocity, electrical current, or  
 16 electrical voltage, then the signal’s variance  $\sigma(0)$  is proportional to its average oscillator potential,  
 17 kinetic, inductor, or resistor energy, respectively. Further note that with Parseval’s theorem we can  
 18 distribute this “energy” among times or frequencies

$$19 \sigma(0) \propto \int_{-\infty}^{+\infty} dt \text{VAR}[x(t)] = \int_{-\infty}^{+\infty} df \text{VAR}[\tilde{x}(f)]. \quad (\text{A.3})$$

21 Therefore the periodogram estimates autocorrelation structure via the spectral-density function and  
 22 distributes the signal’s variance among frequencies in a way that is conjugate to how the variance  
 23 is distributed among times.

24 The naive implementation of the DFT or LS periodogram has a computational cost of  $\mathcal{O}(n^2)$   
 25 to estimate the  $n$  most relevant frequencies within the range  $df \leq f \leq F$  (Table A.1), where  $df$  is  
 26 the natural frequency resolution of the data and  $F$  is the Nyquist frequency or natural frequency  
 27 cutoff of the data. The fast Fourier transform (FFT) reduces this computational cost to  $\mathcal{O}(n \log n)$   
 28 for the DFT periodogram. Furthermore, [Press and Rybicki \(1989\)](#) discovered that, after expanding  
 29 the sinusoids in an evenly spaced grid via Lagrange interpolating polynomials, the LS periodogram  
 30 can also be calculated using FFT techniques. As the Lagrange interpolants are approximations  
 31 of the true functions, the evenly-spaced grid needs to be fine enough to accurately capture the  
 32 high-frequency behavior. Our implementation of the LS periodogram differs in that it is given by a  
 33 simple expression without the necessity of Lagrange interpolation. In the case of evenly scheduled  
 34 data, where our implementation is exact, the cost savings of avoiding Lagrange interpolation are

35 typically on the order of a factor of 10-40 (Press and Rybicki, 1989).

| Time domain         |      | Frequency domain  |                      |
|---------------------|------|-------------------|----------------------|
| temporal resolution | $dt$ | $\Leftrightarrow$ | frequency range      |
|                     |      |                   | $F = 1/(2dt)$        |
| temporal range      | $T$  | $\Leftrightarrow$ | frequency resolution |
|                     |      |                   | $df = 1/T$           |

Table A.1: Conjugate relationship between the temporal quality of data and the frequential quality of data under the DFT. These relations are still approximately true for the Lomb–Scargle periodogram (LSP).

36 For our derivation, we exploit the fact that for the realization of the process of interest  $x(t)$ , we  
 37 know the indicator function

$$38 \quad w(t) \equiv \begin{cases} 1, & x(t) \text{ observed} \\ 0, & x(t) \text{ missed} \end{cases}, \quad (A.4)$$

39  
 40 and, though we have not always measured  $x(t)$  on a uniform time grid, we have measured  $w(t)$   
 41 and (effectively)  $w(t)x(t)$  on a uniform time grid. This scheme is natural for data that are evenly  
 42 scheduled but feature missing values, as the observed times neatly reside in a uniformly spaced grid  
 43 of scheduled observation times that is only slightly larger than the number of observations.

44 Our fast implementation of the LS periodogram then follows the derivation of Scargle (1982).  
 45 We exploit the equivalence of the LS periodogram to a least-squares fit of the data to independent  
 46 sinusoids

$$47 \quad x(t) \approx x_f(t) = A(f) e^{+2\pi i f t} + A(f)^* e^{-2\pi i f t}, \quad (A.5)$$

49 to obtain the amplitudes  $A(f)$ . This fitting has the associated least-squares cost function

$$50 \quad L(f) = \sum_t w(t) |x(t) - x_f(t)|^2, \quad (A.6)$$

51

52 given weights  $w(t)$ . Solutions for the amplitudes must therefore satisfy the system of equations

$$53 \quad \begin{bmatrix} \sum_t w(t) & \sum_t e^{-4\pi i f t} w(t) \\ \sum_t e^{+4\pi i f t} w(t) & \sum_t w(t) \end{bmatrix} \begin{bmatrix} \hat{A}(f) \\ \hat{A}(f)^* \end{bmatrix} = \begin{bmatrix} \sum_t e^{-2\pi i f t} w(t) x(t) \\ \sum_t e^{+2\pi i f t} w(t) x(t) \end{bmatrix}. \quad (A.7)$$

54

55 If we represent the data  $x(t)$  and weights  $w(t)$  on a uniform time grid, with missing data naturally  
 56 weighted by zero, then all of these sums can be calculated with the FFT implementation of the  
 57 DFT of the weights  $w(t)$

$$58 \quad \text{DFT}\{w\}(f) = W(f) = \sum_t e^{-2\pi i f t} w(t), \quad (A.8)$$

59

60 so that we have

$$61 \quad \begin{bmatrix} W(0) & W(2f) \\ W(2f)^* & W(0) \end{bmatrix} \begin{bmatrix} \hat{A}(f) \\ \hat{A}(f)^* \end{bmatrix} = \begin{bmatrix} \text{DFT}\{wx\}(f) \\ \text{DFT}\{wx\}(f)^* \end{bmatrix}. \quad (A.9)$$

62

63 For frequencies  $f$  larger than half the Nyquist frequency  $F$ , it is convenient to exploit the periodicity  
 64 of the transform

$$65 \quad W(2f) = W(2f - 2F). \quad (A.10)$$

66

67 Solving Eq. (A.9) for the amplitudes, we then have

$$68 \quad \hat{A}(f) = \frac{W(0) \text{DFT}\{wx\}(f) - W(2f) \text{DFT}\{wx\}(f)^*}{W(0)^2 - |W(2f)|^2}, \quad (A.11)$$

69

70 while the power estimate in [Scargle \(1982\)](#) Eq. (C3) equates to

$$71 \quad \hat{P}(f) = \frac{1}{2} \left( \sum_t w(t) |x(t)|^2 - \min_{A(f)} L(f) \right), \quad (A.12)$$

72

73 by expressing his power estimate in terms of both  $x(t)$  and  $w(t)$ . Refer to [Scargle \(1982\)](#) for more  
74 details on the “power”, but note simply that it measures the amount of variability in the data  
75 attributable to frequency  $f$ . Combining equations (A.12), (A.6), and (A.5), we now have

$$76 \quad \hat{P}_{\text{LSP}}(f) = - \sum_t w(t) x(t) \hat{x}_f(t) + \frac{1}{2} \sum_t w(t) \hat{x}_f(t)^2, \quad (\text{A.13})$$

$$77 \quad = - \hat{A}(f) \sum_t e^{+2\pi i f t} w(t) x(t) - \hat{A}(f)^* \sum_t e^{-2\pi i f t} w(t) x(t) \quad (\text{A.14})$$

$$78 \quad + \frac{1}{2} \hat{A}(f)^2 \sum_t e^{+4\pi i f t} w(t) + \left| \hat{A}(f) \right|^2 \sum_t w(t) + \frac{1}{2} \hat{A}(f)^{2*} \sum_t e^{-4\pi i f t} w(t),$$

$$79 \quad = - \hat{A}(f) \text{DFT}\{wx\}(f)^* - \hat{A}(f)^* \text{DFT}\{wx\}(f) \quad (\text{A.15})$$

$$80 \quad + \frac{1}{2} \hat{A}(f)^2 W(2f)^* + \left| \hat{A}(f) \right|^2 W(0) + \frac{1}{2} \hat{A}(f)^{2*} W(2f),$$

82 and then combining this expression with Eq. (A.11) we have after some simplification

$$83 \quad \hat{P}_{\text{LSP}}(f) = \frac{W(0) |\text{DFT}\{wx\}(f)|^2 - \text{Re}[W(2f)^* \text{DFT}\{wx\}(f)^2]}{W(0)^2 - |W(2f)|^2}, \quad (\text{A.16})$$

85 which can be constructed entirely from the FFT of  $w(t)$  and  $w(t)x(t)$ .

## 86 A.1 Comparison to the DFT periodogram

87 Strictly speaking the DFT periodogram is not defined for missing data, but researchers not familiar  
88 with the Lomb-Scargle periodogram will typically replace a few missing values of the data with the  
89 mean or an interpolated value. In the case of interpolating the missing value, the effect is to bias  
90 the autocorrelation estimate with the properties of the interpolating function at the scale of the  
91 gaps. I.e., straight-line interpolation over gaps of width  $\Delta t$  gives the appearance of a more ballistic  
92 process over timescales  $\lesssim \Delta t$  and frequency scales of  $\gtrsim 1/\Delta t$ . On the other hand, the case of  
93 replacing missing data with the mean value can be derived from a simpler cost function than that

94 of the Lomb-Scargle periodogram, where relations between different phase sinusoids of the same  
 95 frequency are ignored. With the mean first detrended from the data, then the single-frequency  
 96 fitting and cost functions are given by

$$97 \quad x(t) \approx x_f(t) = A(f) e^{+2\pi i f t}, \quad L(f) = \sum_t w(t) |x(t) - x_f(t)|^2, \quad (A.17)$$

98

99 with the amplitude solutions and power estimates found to be

$$100 \quad \hat{A}(f) = \frac{\text{DFT}\{wx\}(f)}{W(0)}, \quad \hat{P}_{\text{DFT}}(f) = \frac{|\text{DFT}\{wx\}(f)|^2}{W(0)}, \quad (A.18)$$

101

102 where again  $W(f) = \text{DFT}\{w\}(f)$  and  $W(0) = n$ . Comparing this result to the Lomb-Scargle  
 103 periodogram relation that we have derived (A.16), we can see that the mean-imputed DFT peri-  
 104 odogram shows up in the LSP, but it is shifted and rescaled by terms that vanish when  $W(2f) = 0$ .  
 105 If  $w(t) = 1$  for all evenly-sampled  $t$ , then  $W(f) = 0$  for all canonical  $f \neq 0$  and so the LSP reduces  
 106 to the DFT periodogram. In other words, if there are no missing data, the LSP and DFT are  
 107 strictly equivalent. Note, however, that the ordinary method of inflating the frequency resolution  
 108 of the DFT periodogram by padding the data with mean values is also not consistent with the LSP  
 109 value, as padding the data produces a periodogram equivalent to Eq. (A.18). In short, the LSP  
 110 gives an improved result both when there are missing data and when the frequency resolution is  
 111 inflated beyond the natural resolution of the data.

## 112 A.2 Expectation value of the periodogram

113 As noted by Scargle (1982), the DFT and LS periodograms tend to be fairly similar in practice, and  
 114 so one can view the LSP in Eq. (A.16) as being the DFT periodogram  $|\text{DFT}\{wx\}(f)|^2/W(0)$  with  
 115 small corrections. Here we investigate this dominant term of the Lomb-Scargle periodogram under  
 116 different sampling regimes. For simplification we will assume that the sampling and movement

117 processes are independent,  $\langle w(t) x(t') \rangle = \langle w(t) \rangle \langle x(t') \rangle$ , and that the movement process is stationary  
 118 with detrended mean and autocorrelation function  $\text{COV}[x(t), x(t')] = \sigma(t - t')$ . In this case we can  
 119 express the expectation value

$$120 \quad \langle \hat{P}_{\text{LSP}}(f) \rangle \approx \frac{1}{W(0)} \langle |\text{DFT}\{wx\}(f)|^2 \rangle, \quad (\text{A.19})$$

$$121 \quad \approx \frac{1}{W(0)} \sum_{tt'} e^{-2\pi i f(t-t')} \langle w(t) w(t') \rangle \sigma(t-t'). \quad (\text{A.20})$$

123 For the next step we perform an inverse Fourier transform from the frequency  $f$  domain back to  
 124 the time-lag  $\tau$  domain to obtain the equivalent relation

$$125 \quad \text{DFT}^{-1} \left\{ \langle \hat{P}_{\text{LSP}} \rangle \right\}(\tau) \approx \frac{1}{W(0)} \sum_{ft'} e^{+2\pi i f(\tau - [t-t'])} \langle w(t) w(t') \rangle \sigma(t-t'). \quad (\text{A.21})$$

127 If the data vectors  $x(t)$ ,  $w(t)$  are padded with zeros to twice their recorded length  $2N$  (on a uniform  
 128 grid), then the frequency sums evaluate to Kronecker delta functions with the identity

$$129 \quad \delta_K(t) = \frac{\sum_f e^{+2\pi i f t}}{\sum_f} \quad (\text{A.22})$$

131 and so we have

$$132 \quad \text{DFT}^{-1} \left\{ \langle \hat{P}_{\text{LSP}} \rangle \right\}(\tau) \approx \frac{2N}{W(0)} \sum_{tt'} \delta_K(\tau - [t-t']) \langle w(t) w(t') \rangle \sigma(t-t'), \quad (\text{A.23})$$

$$133 \quad \approx \frac{2N}{n(0)} n(\tau) \sigma(\tau), \quad (\text{A.24})$$

135 using the property that the Kronecker delta function is equal to one when its argument is zero and  
 136 zero otherwise, and where  $n(\tau)$  is the number of data pairs recorded with time-lag  $\tau$  between them.  
 137 If the data vectors were not padded with zeros to at least twice their recorded length  $2N$ , and were  
 138 left with length  $N$ , then the second half of the estimate would be a repeat of the first half due to

139 the periodicity of this representation of the Kronecker delta function.

140 The pair number  $n(\tau)$  is also proportional to the inverse transform of the periodogram of the  
141 sampling process  $w(t)$ . Therefore, back in the frequency domain, the periodogram of the movement  
142 process actually represents a convolution of the autocorrelation functions of the sampling process  
143 and the movement process. One might imagine de-biasing this estimator by dividing the result  
144 by a factor of  $n(\tau)$  in the time domain. However, the resulting correlogram would no longer be  
145 positive definite, which renders the corresponding periodogram illegitimate in approximating the  
146 strictly positive eigenvalue spectrum of a positive-definite covariance matrix.

### 147 **A.3 Autocorrelation in the sampling schedule**

148 Equation (A.24) shows the direct link between the autocorrelation function  $\sigma(\tau)$  and the estimated  
149 periodogram  $\hat{P}(f)$ , as given by the number of observation pairs  $n(\tau)$  with time lag  $\tau$  between  
150 them. Importantly, the periodogram is always biased by the sampling schedule through  $n(\tau)$ .  
151 When there are no missing data,  $n(\tau)$  is a simple function that decreases linearly with the time  
152 lag  $\tau$ , and its influence on the periodogram is both predictable and mild. If there are missing data  
153 with no particular autocorrelation structure in timing of their gaps (uncorrelated and uniformly  
154 distributed), then again  $n(\tau)$  has a simple structure that does not contaminate the periodogram  
155 in a non-trivial way. However, if the sampling schedule is itself periodic, or otherwise temporally  
156 autocorrelated, then both the DFT and LS periodograms will exhibit strong biases that say more  
157 about the autocorrelation structure of the sampling schedule than that of the signal. This is why  
158 the diagnostic argument of `ctmm`'s `plot.periodogram` method will plot both the periodogram of  
159 the data and the periodogram of the sampling schedule. Viewing both periodograms side-by-side  
160 allows users to check for any possible autocorrelation structure in the sampling schedule that might  
161 have propagated into the periodogram of the data.

## 162 A.4 Sampling properties and periodogram averaging

163 The sampling regime intuitively constrains the resolution and bandwidth of the periodogram—i.e.,  
164 the precision and range of frequencies over which the period can be estimated. Although, the  
165 Lomb-Scargle periodogram can be calculated for any frequency, it only contains novel information  
166 over some limited set of frequencies. In the case of evenly sampled data where the LSP reduces to  
167 the DFT periodogram, this relationship is exact and is summarized by table A.1. In short, temporal  
168 resolution translates into frequency range, via the Nyquist frequency  $F = 1/(2dt)$ , while temporal  
169 range translates into frequency resolution. With the canonical set of frequencies described in  
170 table A.1, the periodogram contains approximately two locations worth of information per positive  
171 frequency. By default, the `ctmm periodogram` function inflates this resolution by a factor of two with  
172 the `res=1` argument, to make this relationship approximately one-to-one. Inflating the frequency  
173 resolution further will cause the estimates  $\hat{P}(f)$  to be increasingly correlated between frequencies  
174 and lead to a locally smooth periodogram. On the other hand, if the periodogram is evaluated  
175 at frequencies beyond the Nyquist frequency, then the periodogram simply repeats itself, as there  
176 is no information in the data beyond this cutoff. The Lomb-Scargle periodogram approximately  
177 follows the same general relations as the DFT periodogram, though some frequencies can be better  
178 sampled than others.

179 Autocorrelation estimates of any kind can be very noisy for an individual and pooling the esti-  
180 mates of multiple individuals is a good way of reducing this variability. An assumption required to  
181 average periodograms is that the sampling frequencies are roughly the same, as differently struc-  
182 tured sampling schedules lead to different natural biases of the periodogram. To average multiple  
183 individual periodograms, we choose the best frequency resolution (largest  $T$ ), worst Nyquist fre-  
184 quency (largest  $dt$ ), and then weight the estimates by their corresponding amount of data. More  
185 specifically, we distribute the  $n$  degrees of freedom in a dataset over what would be the natural set of  
186 frequencies  $0 < f \leq F$  for that dataset, regardless of how we fix those parameters for the population

187 estimate. The worst Nyquist frequency is chosen because evaluating any one periodogram beyond  
 188 its Nyquist frequency yields a nonsense estimate contaminated by Nyquist frequency periodicities,  
 189 while the best frequency resolution is chosen because inflating a low-resolution periodogram will  
 190 only induce correlated errors and we account for this in the average via weighting. This selection  
 191 criteria is automated by the `ctmm periodogram` function when feeding it a list of telemetry objects.

## 192 **A.5 How periodicity combines with random motion**

193 In App. D we explore periodograms for all of the basic continuous-time movement models, including  
 194 Brownian motion and Ornstein–Uhlenbeck motion, without any periodicity. These basic movement  
 195 models provide what a signal analyst might refer to as nuisance “background noise” in which the  
 196 periodic “signal” exists, in that, for a Gaussian stochastic process the expectation value of the  
 197 periodogram decomposes into

$$198 \quad \langle \hat{P}(f) \rangle = \langle \hat{P}_{\text{stochastic}}(f) \rangle + \langle \hat{P}_{\text{deterministic}}(f) \rangle, \quad (\text{A.25})$$

200 where the stochastic component describes an (on average) smooth curve (e.g.,  $1/f^2$  for Brownian  
 201 motion) and the deterministic mean component gives us the “peak” or “spike” atop this curve.  
 202 Therefore the importance of the height of any periodicity is relative to the background curve of a  
 203 model such as Brownian motion.

## 204 **A.6 Effect of telemetry error on the periodogram**

205 For additive telemetry errors that are uncorrelated with the movement process, the expectation  
 206 value of the periodogram of the noisy, observed process  $\hat{P}_{\text{data}}(f)$  is given by the sum

$$207 \quad \langle \hat{P}_{\text{data}}(f) \rangle = \langle \hat{P}_{\text{move}}(f) \rangle + \langle \hat{P}_{\text{error}}(f) \rangle, \quad (\text{A.26})$$

209 of the animal’s movement process and the error process. The autocorrelation function of an un-  
 210 correlated error process  $\sigma_{\text{error}}(\tau)$  is furthermore proportional to a Dirac delta function  $\delta(\tau)$ , and so  
 211 from Eq. (A.20) the quantity  $\langle \hat{P}_{\text{error}}(f) \rangle$  is approximately constant for all frequencies  $f$ . Therefore,  
 212 the effect of telemetry error is to shift the resulting periodogram vertically along the  $y$ -axis and  
 213 induce further variability in the estimate.

## 214 A.7 A gridding algorithm

215 To apply the periodogram, we want to define a regular temporal grid that is evenly spaced and can  
 216 accommodate all data points. As GPS fixes can be delayed, there can be variability in the realized  
 217 sampling intervals of tracking data. To construct a well behaved grid that avoids an unnecessary  
 218 temporal resolution, we optimize the alignment of our temporal grid relative to the data. Given  
 219 the data, a regular temporal grid (sampling schedule) can be defined by two parameters: an initial  
 220 time  $t_0$  and a grid spacing  $\Delta t$ . For the grid spacing  $\Delta t$ , by default, in `ctmm` we use the median  
 221 realized sampling interval, which performs well if there is a single intended sampling rate. For the  
 222 initial time, we minimize the cost function

$$223 \quad \text{COST}(t_0) = \sum_{i=1}^n \left| \sin\left(\pi \frac{t_i - t_0}{\Delta t}\right) \right|^2, \quad (\text{A.27})$$

224

225 which is zero if all recorded times are aligned with the grid and greater than zero otherwise. This  
 226 cost function has the necessary features of being periodic in the parameter  $t_0$  (with period  $\Delta t$ )  
 227 and increasing monotonically with increasing misalignment. Moreover, this cost function is both  
 228 analytic and exactly solvable. Differentiating and expanding our cost function, we then have the  
 229 optimal grid relation

$$230 \quad 0 = \langle S \rangle \cos\left(2\pi \frac{\hat{t}_0}{\Delta t}\right) + \langle C \rangle \sin\left(2\pi \frac{\hat{t}_0}{\Delta t}\right), \quad (\text{A.28})$$

231

232 in terms of the averages

$$\begin{aligned} 233 \quad \langle S \rangle &= \frac{1}{n} \sum_{i=1}^n \sin\left(2\pi \frac{t_i}{\Delta t}\right), & \langle C \rangle &= \frac{1}{n} \sum_{i=1}^n \cos\left(2\pi \frac{t_i}{\Delta t}\right). & (A.29) \\ 234 \end{aligned}$$

235 It then derives from Eq.(A.28) the following formula for the optimal initial time

$$\begin{aligned} 236 \quad \hat{t}_0 &= -\frac{\Delta t}{2\pi} \tan^{-1}\left(\frac{\langle S \rangle}{\langle C \rangle}\right). & (A.30) \\ 237 \end{aligned}$$

238 This formula is implemented in `ctmm` to propose a default time grid upon which to compute the  
239 LSP.

## 240 **References**

- 241 Press, W. H., and G. B. Rybicki. 1989. Fast algorithm for spectral analysis of unevenly sampled  
242 data. *Astrophysical Journal* 338:277–280.
- 243 Scargle, J. D. 1982. Studies in astronomical time series analysis. II - Statistical aspects of spectral  
244 analysis of unevenly spaced data. *The Astrophysical Journal* 263:835–853.
